# Supplementary material for: Asthma Inflammatory Phenotypes: How Can We Distinguish Them?
Source: MDPI journal article supplement (doi:10.3390/jcm13020526), 2024-01-17
Supplement: s1 [file s1]

Table S1. Biomarkers in asthma patients.

| Biomarker, med (IQR)            | Total                | EA<br>n=25           | NA<br>n=12           | MGA<br>n=24          | PGA<br>n=19           | P*           |
|---------------------------------|----------------------|----------------------|----------------------|----------------------|-----------------------|--------------|
| ESR (mm/h)                      | 12.0 (8.0-18.0)      | 12.0 (9.0-22.0)      | 11.0 (8.0-28.0)      | 13.0 (10.0-19.0)     | 12.0 (8.0-16.0)       | 0.967        |
| CRP (mg/L)                      | 1.5 (1.0-3.2)        | 1.9 (1.4-3.6)        | 1.0 (1.0-1.9)        | 1.5 (1.0-4.1)        | 1.2 (1.0-2.9)         | 0.070        |
| Leucocytes(10 <sup>9</sup> /L)  | 6.3 (5.5-7.3)        | 6.5 (6.0-7.8)        | 6.4 (5.1-7.2)        | 5.7 (5.3-6.8)        | 6.3 (5.6-7.2)         | 0.315        |
| Neutrophils(10 <sup>9</sup> /L) | 3.3 (2.8-4.2)        | 3.5 (3.0-4.1)        | 3.3 (3.1-4.7)        | 2.9 (2.6-3.6)        | 3.3 (2.4-4.5)         | 0.209        |
| Lymphocytes(10 <sup>9</sup> /L) | 2.1 (1.7-2.5)        | 2.2 (1.9-2.6)        | 1.7 (1.2-2.6)        | 2.1 (1.7-2.6)        | 2.1 (1.7-2.3)         | 0.328        |
| Eosinophils(10 <sup>9</sup> /L) | 0.2 (0.1-0.4)        | 0.4 (0.2-0.6)        | 0.1 (0.02-0.2)       | 0.1 (0.1-0.3)        | 0.2 (0.1-0.3)         | <b>0.002</b> |
| IgE (IU/ml)                     | 121.5 (56.2-364.5)   | 186.0 (75.5-414.5)   | 105.0 (63.0-274.2)   | 116.0 (37.2-353.2)   | 78.0 (18.0-270.0)     | 0.224        |
| FeNO (ppb)                      | 23.5 (12.1-37.7)     | 26.6 (15.0-48.0)     | 21.3 (11.9-31.8)     | 20 (8.6-37.5)        | 22.1 (12.0-35.0)      | 0.349        |
| IL-6 (pg/ml)                    | 2.7 (2.0-3.3)        | 2.6 (1.6-3.3)        | 2.5 (1.8-3.0)        | 2.8 (2.1-3.5)        | 2.8 (2.1-3.2)         | 0.747        |
| Periostin (mmol/l), med         | 924.4 (697.5-1325.9) | 950.8 (747.3-1819.5) | 661.4 (517.4-1038.8) | 907.8 (699.2-1212.1) | 1049.6 (858.4-1397.6) | 0.116        |
| IL-5 (pg/ml)                    | 0.0 (0.0-0.0)        | 0.0 (0.0-0.3)        | 0.0 (0.0-1.8)        | 0.0 (0.0-0.0)        | 0.0 (0.0-0.0)         | 0.133        |
| IL-8 (pg/ml)                    | 0.0 (0.0-11.5)       | 0.0 (0.0-5.8)        | 0.5 (0.0-173.8)      | 0.0 (0.0-7.4)        | 0.0 (0.0-15.9)        | 0.200        |
| IL-33 (pg/ml)                   | 21.0 (3.8-122.1)     | 28.6 (4.9-145.7)     | 31.9 (6.6-250.8)     | 16.8 (0.5-78.9)      | 22.9 (8.7-138.1)      | 0.703        |
| IL-17A (pg/ml)                  | 0.0 (0.0-0.0)        | 0.0 (0.0-0.3)        | 0.0 (0.0-0.0)        | 0.0 (0.0-0.2)        | 0.0 (0.0-0.0)         | 0.115        |

\*For the level of significance of 0.05 according to Kruskal-Wallis test.

Abbreviations:EA:eosinophilic asthma; NA:neutrophilic asthma; MGA:mixed-granulocytic asthma;PGA: paucigranulocytic asthma, ESR: erythrocyte sedimentation rate; CRP:C reactive protein; FeNO: fraction of exhaled nitric oxide.

Table S2. Biomarkers in biologic and non-biologic asthma group.

| Biomarker, med (IQR)    | EA               |                    |       | NA            |               |       | MGA                 |                   |              | PGA                |                   |       |
|-------------------------|------------------|--------------------|-------|---------------|---------------|-------|---------------------|-------------------|--------------|--------------------|-------------------|-------|
|                         | Bio n=7          | No bio n=18        | P*    | Bio n=2       | No bio n=10   | P*    | Bio n=6             | No bio n=18       | P*           | Bio n=2            | No bio n=17       | P*    |
| ESR (mm/h)              | 12 (10-24.0)     | 12 (8-22.5)        | 0.879 | Const         | 9(2-36)       | N/A   | 13.5 (8.0-24.0)     | 13.0 (9.5-18.0)   | 0.712        | 9.0 (6.0-9.0)      | 12.0 (8.0-17.0)   | 0.348 |
| CRP (mg/L)              | 1.9 (1.0-2.5)    | 1.9 (1.5-4.2)      | 0.831 | Const         | 1.1 (1-7.1)   | N/A   | 4.6 (1.4-7.5)       | 1.2 (1.0-3.4)     | 0.062        | 1.1 (1.0-1.1)      | 1.2 (1.0-3.0)     | 0.584 |
| Leu(10 <sup>9</sup> /L) | 6.5 (6.3-7.7)    | 6.6 (5.9-8.2)      | 0.808 | 8.4 (5.1-8.4) | 6.4 (5.1-7.0) | 0.666 | 5.3 (4.6-5.8)       | 6.1 (5.5-8.0)     | <b>0.049</b> | 7.15 (7.1-7.15)    | 6.0 (5.5-7.5)     | 0.424 |
| Ne10 <sup>9</sup> /L)   | 3.1 (3.0-3.5)    | 3.6 (2.8-4.5)      | 0.524 | 5.6 (3.4-5.6) | 3.3 (3.0-4.6) | 0.194 | 2.6 (2.1-2.7)       | 3.2 (2.8-4.7)     | <b>0.019</b> | 3.5 (2.3-3.5)      | 3.3 (2.6-4.0)     | 0.894 |
| Ly(10 <sup>9</sup> /L)  | 2.2 (1.1-2.7)    | 2.2 (1.9-2.6)      | 0.745 | 2.1 (1.2-2.1) | 1.7 (1.2-2.6) | 0.747 | 2.0 (1.6-2.3)       | 2.2 (1.8-2.8)     | 0.270        | 2.6 (1.4-2.6)      | 2.1 (1.7-2.2)     | 0.788 |
| Eo(10 <sup>9</sup> /L)  | 0.4 (0.2-0.9)    | 0.35 (0.2-0.6)     | 0.583 | Const         | 0.15(0-0.3)   | N/A   | 0.05 (0.0-0.2)      | 0.2 (0.1-0.3)     | 0.068        | 2.0 (2.0-2.0)      | 0.2 (0.1-0.3)     | 0.543 |
| IgE (IU/ml)             | 370 (38.0-654.0) | 182.5 (75.7-363.5) | 0.545 | 245(53-730)   | 87(53-730)    | 0.283 | 150.5 (108.7-524.7) | 81.5 (20.2-309.5) | 0.161        | 444.5 (39.0-444.5) | 78.0 (18.0-205.0) | 0.425 |

|                               |                                  |                                 |                   |                            |                            |           |                                 |                                 |                   |                                  |                                |           |
|-------------------------------|----------------------------------|---------------------------------|-------------------|----------------------------|----------------------------|-----------|---------------------------------|---------------------------------|-------------------|----------------------------------|--------------------------------|-----------|
| FeNO (ppb)                    | 46.6<br>(24.1-<br>84.1)          | 24.20<br>(14.1-<br>39.4)        | 0.06<br>9         | 51.6<br>(33.0-<br>51.6)    | 16.3<br>(11.6-<br>26.3)    | 0.05<br>3 | 62.9<br>(8.7-<br>62.9)          | 16.2<br>(7.8-<br>16.2)          | 0.10<br>2         | 79.0<br>(35.0-<br>79.0)          | 20.9<br>(11.6-<br>31.6)        | 0.06<br>3 |
| IL-6(pg/ml)                   | 1.7<br>(1.5-<br>3.5)             | 2.8<br>(1.9-<br>3.2)            | 0.19<br>0         | Const                      | 2.45(1.6<br>-14.2)         | N/A       | 3.3<br>(3.1-<br>4.9)            | 2.6<br>(2.1-<br>3.4)            | <b>0.03<br/>2</b> | 2.4<br>(2.1-<br>2.4)             | 3.1<br>(1.8-<br>3.3)           | 0.59<br>4 |
| Periostin<br>(mmol/l),<br>med | 1330.1<br>(783.1-<br>1837.2<br>) | 865.7<br>(697.6-<br>1851.8<br>) | 0.33<br>3         | 795.8<br>(514.7-<br>795.8) | 661.4<br>(521.7-<br>661.4) | 0.83<br>0 | 823.8<br>(611.5-<br>1807.7<br>) | 925.3<br>(713.2-<br>1125.8<br>) | 0.84<br>1         | 1506.8<br>(995.5-<br>1506.8<br>) | 1049<br>(836.4-<br>1355.4<br>) | 0.35<br>2 |
| IL-5<br>(pg/ml)               | 0.3<br>(0.0-<br>1.1)             | 0.0<br>(0.0-<br>0.0)            | <b>0.04<br/>3</b> | 4.1<br>(0.4-<br>4.1)       | 0.0 (0.0-<br>1.0)          | 0.10<br>8 | 0.04<br>(0.0-<br>4.1)           | 0.0<br>(0.0-<br>0.0)            | <b>0.01<br/>2</b> | 6.9<br>(0.0-<br>6.9)             | 0.0<br>(0.0-<br>0.0)           | 0.11<br>7 |
| IL-8<br>(pg/ml)               | 0.0<br>(0.0-<br>13.6)            | 0.0<br>(0.0-<br>2.8)            | 0.42<br>2         | 160.1<br>(16.1-<br>160.1)  | 0.2 (0.0-<br>166.6)        | 0.18<br>1 | 6.1<br>(0.0-<br>33.0)           | 0.0<br>(0.0-<br>0.0)            | <b>0.03<br/>8</b> | 11.9<br>(0.0-<br>11.9)           | 0.0<br>(0.0-<br>7.9)           | 0.54<br>9 |
| IL-33<br>(pg/ml)              | 3.8<br>(1.8-<br>100.9)           | 41.6<br>(10.8-<br>315.0)        | 0.13<br>0         | 15.3<br>(11.8-<br>15.3)    | 45.2<br>(3.7-<br>406.1)    | 0.66<br>7 | 48.5<br>(3.0-<br>209.7)         | 9.4<br>(0.2-<br>89.7)           | 0.31<br>6         | 48.6<br>(16.4-<br>48.6)          | 22.9<br>(4.3-<br>194.9)        | 0.79<br>0 |
| IL-17A<br>(pg/ml)             | 0.0<br>(0.0-<br>0.5)             | 0.0<br>(0.0-<br>1.2)            | 0.33<br>9         | 2.45(2-<br>2.9)            | Const                      | N/A       | 0.0<br>(0.0-<br>1.2)            | 0.0<br>(0.0-<br>0.2)            | 0.66<br>1         | 4.3 (0-<br>8.7)                  | Const                          | N/A       |

\* For the level of significance of 0.05 according Mann- Whitney test.

Abbreviations:EA:eosinophilic asthma; NA:neutrophilic asthma; MGA:mixed-granulocytic asthma;PGA: paucigranulocytic asthma; Bio; biologis, No bio: no biologics; ESR: erythrocyte sedimentation rate; CRP:C reactive protein; Le: leucocytes; Ne: neutrophils; Ly: lymphocyte; Eo: eosinophils; FeNO: fraction of exhaled nitric oxide, Const: constant value with variability equals; NA: not applicable.
